# Supplementary material for: Anatomical Arthroscopic Anterior Talofibular Ligament and Calcaneofibular Ligament Reconstruction Using an Autogenic Hamstring Tendon: Safe Creation of Anatomical Fibular Tunnel
Source: PubMed Central journal article supplement — Arthrosc Tech. 2019 Feb 4;8(3):e215–22. doi: 10.1016/j.eats.2018.10.016 (PMC6470364; doi:10.1016/j.eats.2018.10.016), 2019-02-04
Supplement: mmc2.pdf [file mmc2.pdf]

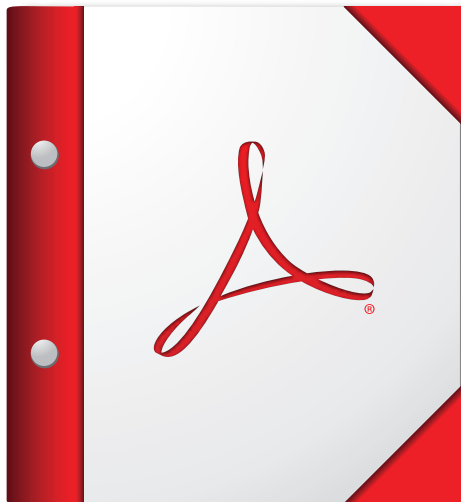

Acrobat X または Adobe Reader X 以降でこの PDF  
ポートフォリオを開いてこれまでにない便利さを体験してください。

**Adobe Reader を今すぐダウンロード!**
